# Supplementary material for: Thalamus Segmentation Using Deep Learning with Diffusion MRI Data: An Open Benchmark
Source: MDPI journal article supplement (doi:10.3390/app13095284), 2023-04-23
Supplement: s1 [file s1]

Archive with 1 entries (1 files):
- applsci-2320653-supplementary.pdf
